# Supplementary material for: Prognostic role of dynamic changes in inflammatory indicators in patients with non-small cell lung cancer treated with immune checkpoint inhibitors—a retrospective cohort study
Source: PubMed Central journal article supplement — Transl Lung Cancer Res. 2024 Aug 28;13(8):1975–87. doi: 10.21037/tlcr-24-637 (PMC11384502; doi:10.21037/tlcr-24-637), 2024-08-28
Supplement: tlcr-13-08-1975-dss.pdf [file tlcr-13-08-1975-dss.pdf]

## Data Sharing Statement

|                     |                                                                                                                                                     |                                                                                                                                                                               |
|---------------------|-----------------------------------------------------------------------------------------------------------------------------------------------------|-------------------------------------------------------------------------------------------------------------------------------------------------------------------------------|
| <b>Article Info</b> | <a href="https://dx.doi.org/10.21037/tlcr-24-637">https://dx.doi.org/10.21037/tlcr-24-637</a>                                                       |                                                                                                                                                                               |
| <b>Item</b>         | <b>Question</b>                                                                                                                                     | <b>Authors' Response<br/>(place "-" if not applicable)</b>                                                                                                                    |
| 1                   | Would you like to share data collected for your study to others?                                                                                    | Yes.                                                                                                                                                                          |
| 2                   | If not, would you like to share the reason for your decision?                                                                                       | -                                                                                                                                                                             |
| 3                   | What data in particular will be shared?                                                                                                             | All the data.                                                                                                                                                                 |
| 4                   | Any other documents will be shared? Such as study protocol, statistical analysis plan, informed consent form, clinical study report, analytic code. | Statistical analysis plan, informed consent form, and clinical study report will also be shared if requested.                                                                 |
| 5                   | When will data availability begin?                                                                                                                  | From the publication date.                                                                                                                                                    |
| 6                   | When will data availability end?                                                                                                                    | Two years within the publication date, since the technique or survival data may be updated over time.                                                                         |
| 7                   | To whom will you share the data?                                                                                                                    | Medical oncologists and thoracic surgeons who are interested in this study.                                                                                                   |
| 8                   | For what type of analysis or purpose?                                                                                                               | For analysis to evaluate prognostic role of dynamic changes in inflammatory indicators in patients with non-small cell lung cancer treated with immune checkpoint inhibitors. |
| 9                   | How or where can the data/documents be obtained?                                                                                                    | Emails could be sent to the address below to obtain the shared data: guoliang700@163.com.                                                                                     |
| 10                  | Any other restrictions?                                                                                                                             | We may balance the potential benefits and risks for each request and then provide the data that could be shared.                                                              |
